# Supplementary material for: Synergistic effect of eribulin and CDK inhibition for the treatment of triple negative breast cancer
Source: PubMed Central journal article supplement (PMC5663565; doi:10.18632/oncotarget.20202), 2017-08-10
Supplement: oncotarget-08-83925-s001.pdf [file oncotarget-08-83925-s001.pdf]

# Synergistic effect of eribulin and CDK inhibition for the treatment of triple negative breast cancer

## SUPPLEMENTARY MATERIALS

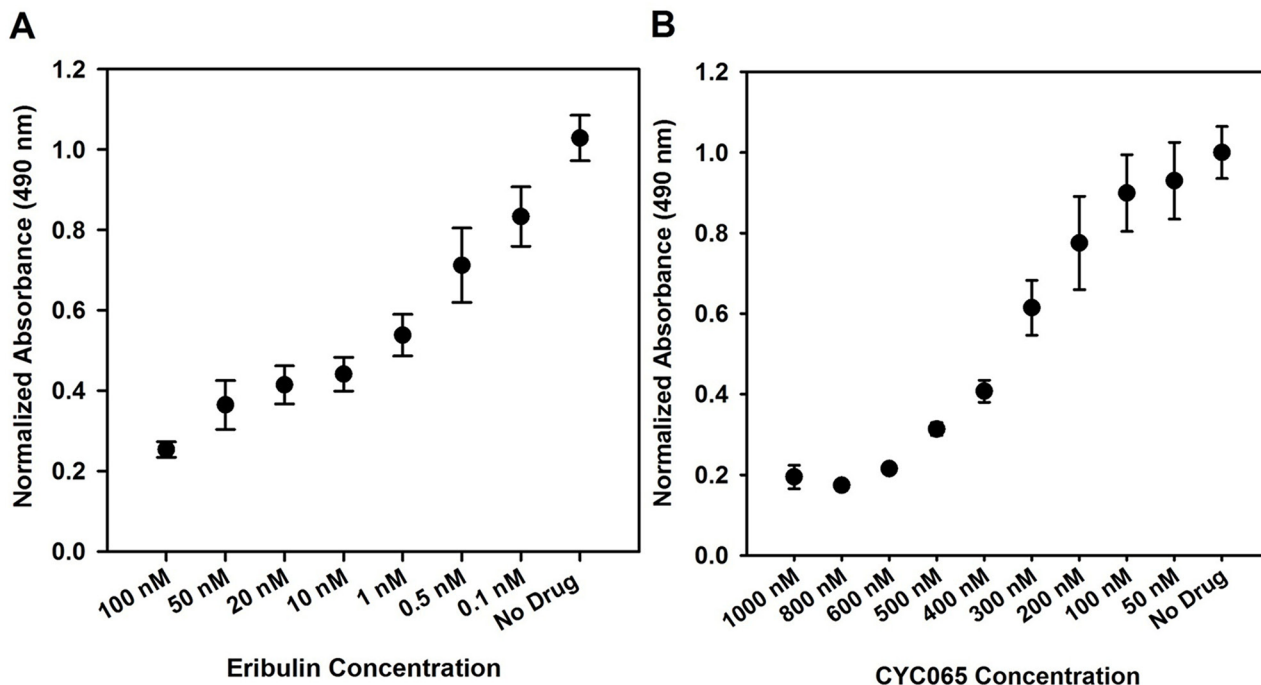

**Supplementary Figure 1: Eribulin and CYC065 inhibit proliferation of MDA-MB-231 cells in the nM range.** Dose curve for MDA-MB-231 cells cultured on 2D monolayer and treated with varying concentrations of (A) eribulin or (B) CYC065 for 48 hours. Proliferation was assessed using the MTS assay (N=4).

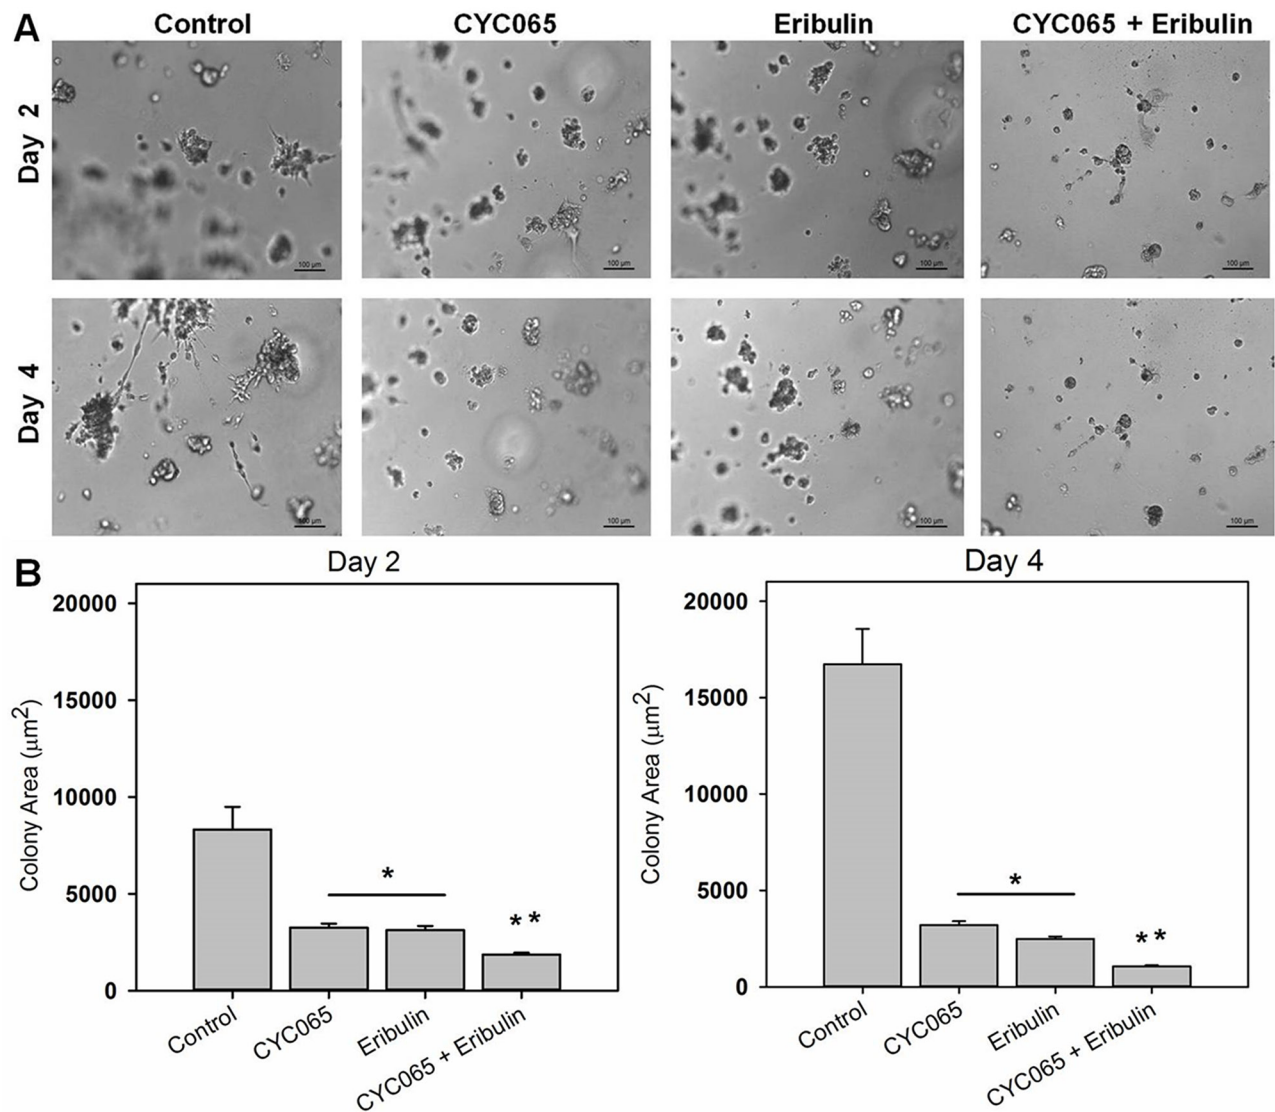

**Supplementary Figure 2: CYC065 in combination with eribulin decreases colony size of MDA-MB-436 cells in 3D Matrigel matrices over time when compared to individual treatments. (A)** Representative optical microscopy images of MDA-MB-436 colonies cultured on top of 3D Matrigel at day 2 and day 4 post-treatment for control, CYC065, eribulin, and combination of CYC065 and eribulin. **(B)** Quantification of colony size for all conditions in 3D Matrigel matrices. (N = 4 hydrogels per group; n ≥ 65 colonies per group). \* indicates groups that are statistically significant from control and CYC065 + eribulin but not each other. \*\* indicates groups that are statistically significant from all other groups ( $p < 0.05$ ).

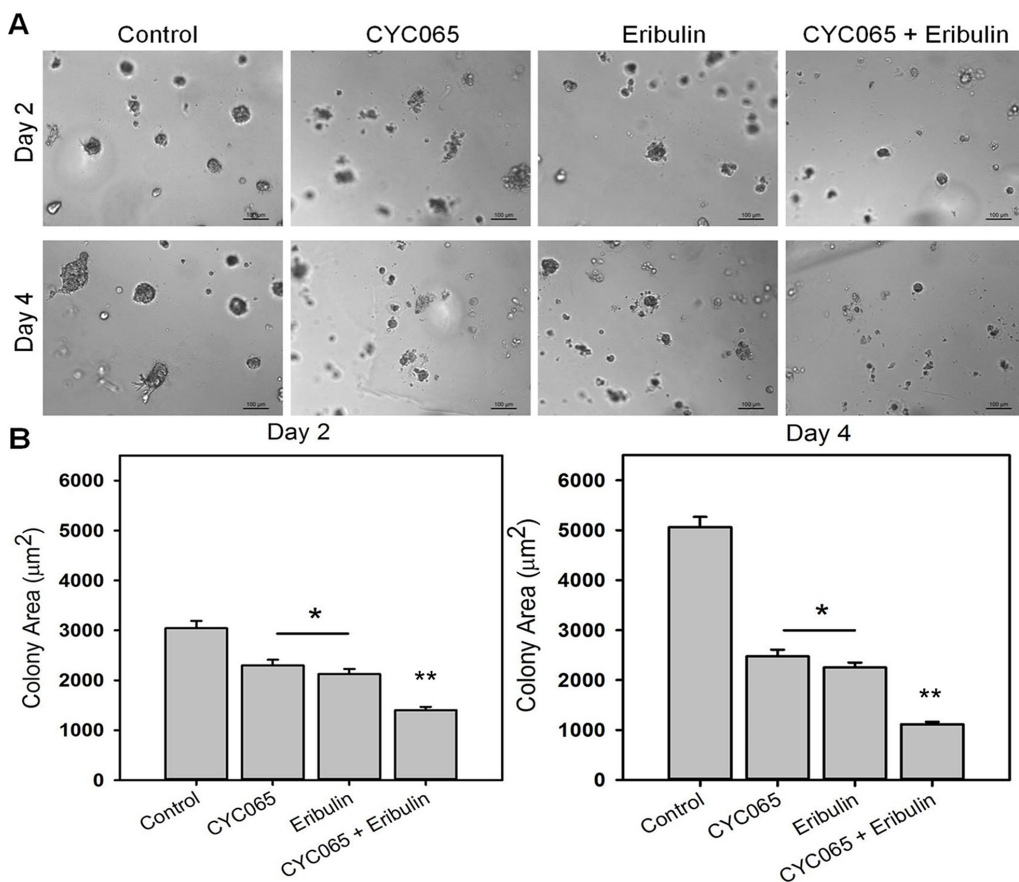

**Supplementary Figure 3: CYC065 in combination with eribulin decreases colony size of Hs578-T cells in 3D Matrigel matrices over time when compared to either treatment.** (A) Representative optical microscopy images of Hs578T colonies cultured on top of 3D Matrigel at day 2 and day 4 post-treatment for control, CYC065, eribulin, and combination of CYC065 and eribulin. (B) Quantification of colony size for all conditions in 3D Matrigel matrices. (N = 4 hydrogels per group; n ≥ 65 colonies per group). \* indicates groups that are statistically significant from control and CYC065 + eribulin but not each other. \*\* indicates groups that are statistically significant from all other groups ( $p < 0.05$ ).

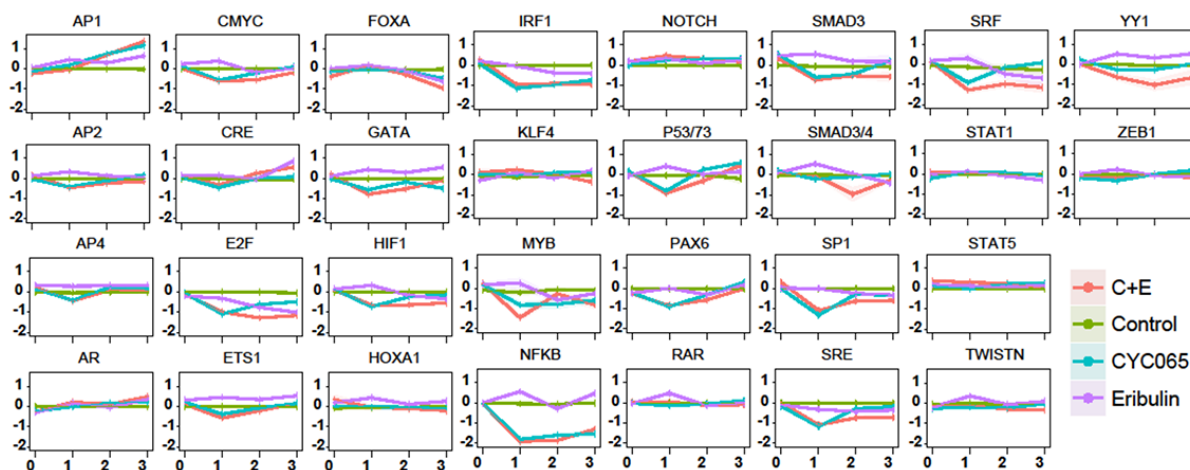

**Supplementary Figure 4: Dynamics of TF activity in response to therapeutic treatments.** (A) Normalized TF activity of 10 cluster groups and (B) normalized TF activity of 30 TRACER reporters over 3 days for CYC065, eribulin, and CYC065 + eribulin (C+E) treatments. The error bars represent the 95% confidence interval.

**Supplementary Table 1: List of transcription factor (TF) reporters used in TRACER studies**

| Factor | Name                                               | Sequence                                                                                                                               |
|--------|----------------------------------------------------|----------------------------------------------------------------------------------------------------------------------------------------|
| AP1    | Activator Protein 1                                | TGACTAATGACTAATGACTAATGACTAATGACTAATGACTAATGACTAATGACTAATGACTAA                                                                        |
| AP2    | Transcription Factor AP2                           | CGATCGAACTGACCGCCCGCGGCCCGTGATCGAACTGACCGCCCGCGGCCCGTAGATC                                                                             |
| AP4    | Transcription Factor AP4                           | CGAAAGAACCAGCTGTGGAATGTGAAAGAACCAGCTGTGGAATGTAGATC                                                                                     |
| AR     | Androgen Receptor                                  | GTCTGGTACAGGGTGTCTTTTGTCTGGTACAGGGTGTCTTTT                                                                                             |
| CMYC   | MYC                                                | CACGTGCACGTGCACGTGCACGTGCACGTG                                                                                                         |
| CRE    | cAMP Response Element-Binding Protein 1            | GCACCAGACAGTGACGTCATGGCCGTCATGACGTCACCCATTGACGTCAATGGGAGAAC                                                                            |
| E2F    | E2F Transcription Factor 1                         | CTTGGCGGGAGATAGGAACTTGGCGGGAGATAGGAACTTGGCGGGAGATAGGAA                                                                                 |
| ETS1   | ETS1                                               | GCTAGCGCGGAAGCGCGGAAGCGCGGAAGCGCGGAAGCGCGGAAGCACCGGT                                                                                   |
| FOXA   | Forkhead Box A1                                    | GAGTGTTTACTTGAGTGTTTACTTTGAGTGTTTACTTGAGTGTTTACTTGAGTGTTTACT<br>TGAGTGTTTACTT                                                          |
| GATA   | GATA                                               | CACTTGATAACAGAAAGTGATAATGATAACAGAAAGTGATAACTCT                                                                                         |
| HIF1   | Hypoxia Inducible Factor 1A                        | GTGACTACGTGCTGCCTAGGTGACTACGTGCTGCCTAGGTGACTACGTGCTGCCT<br>AGGTGACTACGTGCTGCCTAG                                                       |
| HOXA1  | Homeobox A1                                        | CTGAGCTAATTACCGTCTGAGCTAATTACCGTCTGAGCTAATTAC                                                                                          |
| IRF1   | Interferon Response Factor 1                       | GGAAGCGAAATGAAATTGACTGGAAGCGAAAATGAAATTGACTGGAAGCGAAATGAAATTGACTGGA<br>AGCGAAAATGAAATTGACTGGAAGCGAAAATGAAATTGACTGGAAGCGAAAATGAAATTGACT |
| KLF4   | Kruppel-like Factor 4                              | AAAGAAAAAAAAAGGGAAGGAGGGAAAGGGAAGGAGGGAAAGGAAGGAAGGAAGGG                                                                               |
| MYB    | Oncogene MYB                                       | CAACCGTTATCAACCGTTATCAACCGTTATCAACCGTTATCAACCGTTATCAACCGTTAT                                                                           |
| NFKB   | Nuclear Factor kB                                  | GGGAATTTCCGGGAATTTCCGGGAATTTCCGGGAATTTCCGGGAATTTCCGGGAATTTCC                                                                           |
| NOTCH  | NOTCH                                              | CGTGGGAAACGTGGGAAACGTGGGAAA                                                                                                            |
| P53_73 | p53/p73                                            | CCAGGCAAGTCCAGGCAGGCCAGGCAAGTCCAGGCAGGCCAGGCAAGTCCAGGCAGGCCAGG<br>CAAGTCCAGGCAGG                                                       |
| PAX6   | Paired box gene 6                                  | TTCACGCCTGACTGATTACGCCTGACTGATTACGCCTGACTGATTACGCCTGACTGA                                                                              |
| RAR    | Retinoic Acid Receptor                             | AGGTCACCAGGAGGTCACCAGGAGGTCACCAGGAGGTCACCAGGAGGTCACCAGGAGGTC                                                                           |
| SMAD3  | SMAD3                                              | CAGCCAGACATCGCATCAGCAAGCCAGACATCGCATCAGCAAGCCAGACATCGCATC<br>AGCAAGCCAGACATCGCATCAGCAACCGG                                             |
| SP1    | Transcription Factor SP1                           | ATTCGATCGGGGCGGGGCGAGATTAGATTGATCGATCGGGGCGGGGCGAG                                                                                     |
| SRE    | Serum Response Element                             | GGATGTCCATATTAGGACATC                                                                                                                  |
| SRF    | Serum Response Factor                              | GGATGTCCATATTAGGACATCTGGATGTCCATATTAGGACATCTGGATGTCCATATTAGGACATCT                                                                     |
| STAT1  | Signal Transducer and Activator of Transcription 1 | GTATTTCCAGAAAAGGAACGTATTTCCAGAAAAGGAACGTATTTCCAGAAAAGGAAC                                                                              |
| STAT5  | Signal Transducer and Activator of Transcription 5 | ATTTCCAGGAAAT ATTTCCAGGAAATATTTCCAGGAAAT                                                                                               |
| TWISTN | TWISTN                                             | GGTTAAGTGCACCATGTGGATTGTACAACCTGGTTAAGTGCACCATGTGGATTGTACAACCT                                                                         |
| YY1    | Transcription Factor YY1                           | CGCTCCCCGCCATCTTGGCGGGTGGTCGCTCCCCGCCATCTTGGCGGCTGGT                                                                                   |
| ZEB1   | ZEB1                                               | ACTCACCTGTGTACTCACCTGTGTACTCACCTGTGTACTCACCTGTGT                                                                                       |

Supplementary Table 2: List of significant transcription factors from TRACER studies

| CYC065  |       |         | Eribulin |      |         | Combo   |       |         |
|---------|-------|---------|----------|------|---------|---------|-------|---------|
| 1       | 2     | 3       | 1        | 2    | 3       | 1       | 2     | 3       |
| AP1     | AP1   | AP1     | AP1      | CMYC | AP1     | AP1     | AP1   | AP1     |
| AP2     | AR    | AP2     | AR       | E2F  | AR      | AP2     | AP2   | CMYC    |
| AP4     | E2F   | AR      | NFKB     | IRF1 | CRE     | AP4     | AR    | CRE     |
| AR      | IRF1  | CRE     | p53/p73  |      | E2F     | AR      | CMYC  | E2F     |
| CMYC    | NFKB  | E2F     | RAR      |      | ETS1    | CMYC    | E2F   | HIF1    |
| CRE     | NOTCH | IRF1    | TWISTN   |      | FOXA    | CRE     | GATA  | IRF1    |
| E2F     | SMAD3 | KLF4    |          |      | GATA    | E2F     | HIF1  | NFKB    |
| ETS1    |       | NFKB    |          |      | HIF1    | ETS1    | HOXA1 | p53/p73 |
| GATA    |       | NOTCH   |          |      | IRF1    | GATA    | IRF1  | SP1     |
| HIF1    |       | p53/p73 |          |      | KLF4    | HIF1    | MYB   | SRE     |
| IRF1    |       | PAX6    |          |      | NFKB    | HOXA1   | NFKB  |         |
| KLF4    |       | SP1     |          |      | p53/p73 | IRF1    | SMAD3 |         |
| MYB     |       | STAT5   |          |      | PAX6    | KLF4    | SP1   |         |
| NFKB    |       | TWISTN  |          |      | SP1     | MYB     | SRE   |         |
| NOTCH   |       | ZEB1    |          |      | TWISTN  | NFKB    | SRF   |         |
| p53/p73 |       |         |          |      | YY1     | NOTCH   | YY1   |         |
| PAX6    |       |         |          |      |         | p53/p73 |       |         |
| SMAD3   |       |         |          |      |         | PAX6    |       |         |
| SP1     |       |         |          |      |         | SMAD3   |       |         |
| SRE     |       |         |          |      |         | SP1     |       |         |
| SRF     |       |         |          |      |         | SRE     |       |         |
| YY1     |       |         |          |      |         | SRF     |       |         |
|         |       |         |          |      |         | YY1     |       |         |
